# Supplementary material for: Porcine Forebrain Vacuolization Associated with Wasting in Pigs: A Novel Pathological Outcome Associated with Vitamin–Mineral Deficiency?
Source: MDPI journal article supplement (doi:10.3390/ani13142255), 2023-07-10
Supplement: s1 [file s1]

**Supplementary file S8.** Spongiosis score in different areas of the brain of the 14 selected animals for specific neuropathological studies.

|              | Case         | Hippocampus | Parietal cortex | Temporal cortex | Frontal cortex | Occipital cortex | Caudate nuclei | Pyriiform lobe | Internal capsule | Putamen/pallidus nucleus | Thalamus   | Hypothalamus | Mesencephalon | Medulla oblongata | Cerebellar cortex | Cerebellar nucleus |
|--------------|--------------|-------------|-----------------|-----------------|----------------|------------------|----------------|----------------|------------------|--------------------------|------------|--------------|---------------|-------------------|-------------------|--------------------|
| Non-affected | N-366/17     | 0,00        | 0,00            | 0,00            | 0,00           | 0,00             | 0,00           | 0,00           | 0,00             | 0,00                     | 0,00       | 0,00         | 0,00          | 0,00              | 0,00              | 0,00               |
|              | N-442/17     | 0,00        | 0,00            | 0,00            | 0,00           | 0,00             | 0,00           | 0,00           | 0,00             | 0,00                     | 0,00       | 0,00         | 0,00          | 0,00              | 0,00              | 0,00               |
|              | N-355/17     | 0,00        | 0,00            | 0,00            | 0,00           | 0,00             | 0,00           | 0,00           | 0,00             | 0,00                     | 0,00       | 0,00         | 1,00          | 0,00              | 1,00              | 1,00               |
|              | N-356/17     | 0,00        | 0,00            | 0,00            | 0,00           | 0,00             | 0,00           | 0,00           | 1,00             | 0,00                     | 0,00       | 0,00         | 0,00          | 0,00              | 0,00              | 0,00               |
|              | Non-affected | 0,00        | 0,00            | 0,00            | 0,00           | 0,00             | 0,00           | 0,00           | 0,25             | 0,00                     | 0,00       | 0,00         | 0,25          | 0,00              | 0,25              | 0,25               |
|              | sem          | 0           | 0               | 0               | 0              | 0                | 0              | 0              | 0,25             | 0                        | 0          | 0            | 0,25          | 0                 | 0,25              | 0,25               |
|              |              |             |                 |                 |                |                  |                |                |                  |                          |            |              |               |                   |                   |                    |
|              |              |             |                 |                 |                |                  |                |                |                  |                          |            |              |               |                   |                   |                    |
| Moderate     | N-372/17     | 0,00        | 2,00            | 1,00            | 2,00           | 1,00             | 2,00           | 0,00           | 1,00             | 0,00                     | 1,00       | 0,00         | 0,00          | 1,00              | 0,00              | 0,00               |
|              | N-364/17     | 0,00        | 1,00            | 1,00            | 1,00           | 1,00             | 2,00           | 0,00           | 1,00             | 0,00                     | 2,00       | 0,00         | 0,00          | 0,00              | 0,00              | 0,00               |
|              | N-359/17     | 0,00        | 1,00            | 1,00            | 1,00           | 1,00             | 1,00           | 0,00           | 1,00             | 0,00                     | 2,00       | 0,00         | 0,00          | 0,00              | 0,00              | 0,50               |
|              | N-360/17     | 0,00        | 0,50            | 0,50            | 1,00           | 1,00             | 0,00           | 0,00           | 1,00             | 1,00                     | 2,00       | 0,00         | 0,00          | 0,00              | 0,00              | 0,50               |
|              | N-370/17     | 0,00        | 1,00            | 1,00            | 1,50           | 1,00             | 2,00           | 0,00           | 1,50             | 1,00                     | 2,50       | 0,00         | 2,00          | 1,00              | 0,00              | 0,50               |
|              | Moderate     | 0,00        | 1,10            | 0,90            | 1,30           | 1,00             | 1,40           | 0,00           | 1,10             | 0,40                     | 1,90       | 0,00         | 0,40          | 0,40              | 0,00              | 0,30               |
|              | sem          | 0           | 0,24494897      | 0,1             | 0,2            | 0                | 0,4            |                | 0,1              | 0,24494897               | 0,24494897 | 0            | 0,4           | 0,24494897        | 0                 | 0,12247449         |
| Intense      | N-403/17     | 0,00        | 2,00            | 2,00            | 2,50           | 2,50             | 2,50           | 0,00           | 2,00             | 0,00                     | 3,00       | 0,00         | 3,00          | 0,50              | 0,50              | 1,50               |
|              | N-438/17     | 0,00        | 2,50            | 2,50            | 3,00           | 2,50             | 2,50           | 0,00           | 2,00             | 1,00                     | 3,00       | 0,00         | 3,00          | 0,50              | 0,50              | 1,00               |
|              | N-410/17     | 0,00        | 3,00            | 3,00            | 3,00           | 2,00             | 3,00           | 1,00           | 3,00             | 0,00                     | 3,00       | 0,00         | 3,00          | 1,00              | 1,00              | 2,50               |
|              | N-404/17     | 0,00        | 2,50            | 2,50            | 2,00           | 2,00             | 2,00           | 1,00           | 2,50             | 1,00                     | 3,00       | 0,00         | 3,00          | 1,00              | 2,00              | 2,00               |
|              | N-361/17     | 0,00        | 1,50            | 2,00            | 3,00           | 2,00             | 1,50           | 1,00           | 3,00             | 1,00                     | 2,00       | 0,00         | 2,00          | 1,00              | 1,00              | 1,00               |
|              | Intense      | 0,00        | 2,30            | 2,40            | 2,70           | 2,20             | 2,30           | 0,60           | 2,50             | 0,60                     | 2,80       | 0,00         | 2,80          | 0,80              | 1,00              | 1,60               |
|              | sem          | 0           | 0,25495098      | 0,18708287      | 0,2            | 0,12247449       | 0,254951       | 0,244949       | 0,2236068        | 0,24494897               | 0,2        | 0            | 0,2           | 0,12247449        | 0,27386128        | 0,29154759         |
