# Supplementary material for: Porcine Forebrain Vacuolization Associated with Wasting in Pigs: A Novel Pathological Outcome Associated with Vitamin–Mineral Deficiency?
Source: MDPI journal article supplement (doi:10.3390/ani13142255), 2023-07-10
Supplement: s1 [file s1]

**Supplementary file S5.** Haematology parameters from pigs from farms 1 and 2\*.

|               | Animal reference | RBC (x10 <sup>6</sup> cel/ $\mu$ L) | WBC (x10 <sup>3</sup> cel/ $\mu$ L) | HB (g/dL) | Ht (%) | Neu (%) | Lin (%) | Mon (%) | Eos (%) | Pla (x10 <sup>3</sup> plt/ $\mu$ L) | PT (mg/dL) |
|---------------|------------------|-------------------------------------|-------------------------------------|-----------|--------|---------|---------|---------|---------|-------------------------------------|------------|
| <b>Farm 1</b> | N-364/17         | 6.96                                | 10.63                               | 10.3      | 29.4   | 40.2    | 56.6    | 1.8     | 0.5     | 661                                 | 5.2        |
|               | N-365/17         | 6.74                                | 15.87                               | 9.4       | 27.9   | 57      | 40      | 1.2     | 1       | 944                                 | 5.1        |
|               | N-366/17         | 6.18                                | 17.54                               | 9.4       | 27.6   | 63.9    | 32.4    | 1.6     | 0.9     | 819                                 | 5.1        |
|               | N-367/17         | 6.87                                | 17.25                               | 9.7       | 28.2   | 55.9    | 40      | 2.2     | 0.7     | 772                                 | 5.6        |
|               | N-368/17         | 6.25                                | 17.73                               | 9.5       | 28.1   | 69      | 27.3    | 2.6     | 0.8     | 574                                 | 5          |
|               | N-369/17         | 6.54                                | 10.62                               | 9.9       | 29.7   | 52.4    | 44.1    | 1.9     | 0.7     | 487                                 | 5.6        |
|               | N-370/17         | 6.24                                | 19.22                               | 9.2       | 26.6   | 69.1    | 27.5    | 2       | 0.8     | 755                                 | 5.1        |
|               | N-371/17         | 6.09                                | 12.75                               | 10.1      | 30.3   | 58.1    | 37.5    | 2.8     | 0.3     | 627                                 | 5.1        |
|               | N-372/17         | 7.21                                | 24.03                               | 10.8      | 32.1   | 77.8    | 19.9    | 1.4     | 0.4     | 705                                 | 5          |
|               | N-373/17         | 3.76                                | 19.54                               | 5.6       | 17.7   | 73.4    | 21.1    | 4.8     | 0.4     | 1079                                | 4.6        |
| <b>Farm 2</b> | N-354/17         | 6.3                                 | 18.3                                | 9.9       | 30     | 62.3    | 34.8    | 1.3     | 0.4     | 616                                 | 5.4        |
|               | N-355/17         | 4.91                                | 9.79                                | 8.3       | 25.1   | 44.7    | 49.1    | 2.7     | 1.4     | 458                                 | 4.4        |
|               | N-356/17         | 5.43                                | 15.62                               | 8.4       | 24.8   | 61.9    | 34.8    | 1       | 1.2     | 588                                 | 5.4        |
|               | N-357/17         | 6.15                                | 17.03                               | 9.9       | 30     | 58.8    | 36      | 3.1     | 0.8     | 662                                 | 5.4        |
|               | N-358/17         | 5.39                                | 24.5                                | 7.4       | 23     | 58.3    | 35.8    | 2.6     | 0.3     | 649                                 | 5          |
|               | N-359/17         | 5.47                                | 15.05                               | 9.7       | 27.2   | 57.8    | 38.2    | 1.7     | 0.9     | 562                                 | 5.1        |
|               | N-360/17         | 5.49                                | 18.35                               | 9.5       | 28.1   | 68.8    | 27.1    | 2.3     | 0.6     | 968                                 | 5.4        |
|               | N-361/17         | 5.1                                 | 13.18                               | 8.2       | 23.8   | 51.9    | 45.4    | 1.4     | 0.5     | 900                                 | 5.3        |
|               | N-362/17         | 5.59                                | 16.72                               | 8.4       | 25     | 56      | 41.2    | 1.2     | 0.9     | 500                                 | 4.2        |
|               | N-363/17         | 5.29                                | 8.23                                | 9.5       | 27.3   | 42.9    | 51.6    | 3.5     | 0.5     | 516                                 | 4.8        |
|               | Ref.Values*      | 5-8                                 | 11-22                               | 9-14      | 26-41  | 16-73   | 12-70   | 0-17    | 0-6     | 100-900                             | 4.4-7.4    |

\*Reference values: Cardiovascular system, hematology and clinical chemistry. Diseases of Swine. Iowa State University. 2019.

RBC=red blood cells; WBC=white blood cells; HB=hemoglobin; Ht=hematocrit; Neu=neutrophils; Lin=lymphocytes; Mon=monocytes; Eos=eosinophils; Pla=platelets; PT=total protein.
