# Supplementary material for: Porcine Forebrain Vacuolization Associated with Wasting in Pigs: A Novel Pathological Outcome Associated with Vitamin–Mineral Deficiency?
Source: MDPI journal article supplement (doi:10.3390/ani13142255), 2023-07-10
Supplement: s1 [file s1]

**Supplementary file S1. Multivitamin and mineral complex composition.**

**Water-soluble complementary feed in oral solution\***

| Composition     | Per litre |
|-----------------|-----------|
| Dextrose        | 0.50%     |
| Sodium chloride | 0.50%     |

| Additives                                            | Grams |
|------------------------------------------------------|-------|
| <i>Trace elements or compounds of trace elements</i> |       |
| Zinc (E6) (glycine chelate hydrate)                  | 15g   |
| Copper (E4) (glycine chelate hydrate)                | 2.5g  |
| Manganese (E5) (glycine chelate-hydrate)             | 10g   |

\*0.5 litres of product for every 1.000 liters of drinking water, for 3 weeks, or 1 litre of product for every 1.000 litres of drinking water, for 1 week.

**Water-soluble complementary feed in oral solution. Growth stimulant and hepatoprotector\*\***

| Composition                    | Per liter |
|--------------------------------|-----------|
| Magnesium sulfate heptahydrate | 4%        |
| Propylene glycol               | 2.70%     |

| Additives per liter                        | Grams  |
|--------------------------------------------|--------|
| Sorbitol (E420)                            | 140    |
| Choline Chloride (3a890)                   | 125    |
| D-Panthenol (3a842)                        | 10     |
| Sodium ascorbate (1b301)                   | 6.8    |
| Niacinamide (Vit. B3) (3a315)              | 5      |
| Pyridoxine hydrochloride (Vit. B6) (3a831) | 5      |
| Potassium sorbate (E 202).                 | 2.7    |
| Artichoke extract                          | 6      |
| Vitamin E (3a700)                          | 2      |
| Thiamine hydrochloride (Vit. B1) (3a820)   | 2      |
| Riboflavin phosphate sodium (Vit. B2)      | 1.4    |
| Cyanocobalamin (Vit. B12)                  | 3 (mg) |

\*\*2-3 L for every 1.000 L of drinking water for 7-10 days.
