# Supplementary material for: Porcine Forebrain Vacuolization Associated with Wasting in Pigs: A Novel Pathological Outcome Associated with Vitamin–Mineral Deficiency?
Source: MDPI journal article supplement (doi:10.3390/ani13142255), 2023-07-10
Supplement: s1 [file s1]

**Supplementary file S2. Animal weights.**

|               | <b>Reference</b> | <b>Condition</b> | <b>Sex</b> | <b>Weight (Kg)</b> |
|---------------|------------------|------------------|------------|--------------------|
| <b>Farm 1</b> | N-364/17         | Normal           | Female     | 16.78              |
|               | N-365/17         | Normal           | Female     | 17.56              |
|               | N-366/17         | Normal           | Male       | 14.82              |
|               | N-367/17         | Normal           | Male       | 16.54              |
|               | N-368/17         | Normal           | Male       | 15.5               |
|               | N-369/17         | Wasted           | Female     | 11.86              |
|               | N-370/17         | Wasted           | Female     | 11.78              |
|               | N-371/17         | Wasted           | Male       | 14.18              |
|               | N-372/17         | Wasted           | Female     | 12.12              |
|               | N-373/17         | Wasted           | Male       | 12.04              |
| <b>Farm 2</b> | N-354/17         | Normal           | Male       | 16.7               |
|               | N-355/17         | Normal           | Female     | 11.3               |
|               | N-356/17         | Normal           | Male       | 18.34              |
|               | N-357/17         | Normal           | Male       | 18.02              |
|               | N-358/17         | Normal           | Female     | 13.6               |
|               | N-359/17         | Wasted           | Male       | 9                  |
|               | N-360/17         | Wasted           | Male       | 8.28               |
|               | N-361/17         | Wasted           | Male       | 8.94               |
|               | N-362/17         | Wasted           | Male       | 9.42               |
|               | N-363/17         | Wasted           | Male       | 9.48               |
| <b>Farm 3</b> | N-403/17         | Wasted           | Female     | 7.64               |
|               | N-404/17         | Wasted           | Male       | 6.2                |
|               | N-405/17         | Wasted           | Male       | 7.28               |
|               | N-406/17         | Wasted           | Male       | 9.1                |
|               | N-407/17         | Wasted           | Male       | 6.78               |
|               | N-408/17         | Normal*          | Female     | 8.82               |
|               | N-409/17         | Normal*          | Male       | 10.04              |
|               | N-410/17         | Normal*          | Female     | 9.78               |
|               | N-411/17         | Normal*          | Male       | 10.1               |
|               | N-412/17         | Normal*          | Male       | 9.24               |
| <b>Farm 4</b> | N-436/17         | Wasted           | Male       | 9.04               |
|               | N-437/17         | Wasted           | Female     | 10.82              |
|               | N-438/17         | Wasted           | Male       | 8.98               |
|               | N-439/17         | Wasted           | Male       | 8.14               |
|               | N-440/17         | Wasted           | Female     | 7.46               |
|               | N-441/17         | Normal           | Female     | 18.6               |
|               | N-442/17         | Normal           | Female     | 14.2               |
|               | N-443/17         | Normal           | Female     | 17.84              |
|               | N-444/17         | Normal           | Female     | 18.6               |
|               | N-445/17         | Normal           | Female     | 20.94              |
| <b>Farm 5</b> | N-510/17         | Normal           | Male       | 23                 |
|               | N-511/17         | Normal           | Female     | 16                 |

|                             |          |        |        |       |
|-----------------------------|----------|--------|--------|-------|
|                             | N-512/17 | Normal | Male   | 15    |
|                             | N-513/17 | Normal | Female | 15.5  |
|                             | N-514/17 | Normal | Male   | 16.5  |
|                             | N-515/17 | Wasted | Male   | 8     |
|                             | N-516/17 | Wasted | Male   | 11.5  |
|                             | N-517/17 | Wasted | Female | 9     |
|                             | N-518/17 | Wasted | Male   | 9.5   |
|                             | N-519/17 | Wasted | Male   | 4.5   |
|                             | N-520/17 | Wasted | Female | 6.5   |
| <b>Farm 8 (first batch)</b> | N-392/17 | Wasted | Male   | 9.34  |
|                             | N-393/17 | Wasted | Male   | 9.68  |
|                             | N-394/17 | Wasted | Male   | 7.64  |
|                             | N-395/17 | Wasted | Male   | 8.42  |
|                             | N-396/17 | Wasted | Female | 9.36  |
|                             | N-397/17 | Normal | Female | 16.7  |
|                             | N-398/17 | Normal | Female | 16.58 |
|                             | N-399/17 | Normal | Male   | 9.98  |
|                             | N-400/17 | Normal | Female | 13.96 |
|                             | N-401/17 | Normal | Male   | 14.42 |

\*Based on the body condition of submitted animals, they were finally classified as also affected by the wasting condition.
