# Supplementary material for: Porcine Forebrain Vacuolization Associated with Wasting in Pigs: A Novel Pathological Outcome Associated with Vitamin–Mineral Deficiency?
Source: MDPI journal article supplement (doi:10.3390/ani13142255), 2023-07-10
Supplement: s1 [file s1]

**Supplementary file S7.** Details of antibodies, their dilution and incubation period for the immunohistochemical techniques used in the study.

| <b>Primary antibody</b> | <b>Dilution</b> | <b>Manufacturer reference</b> | <b>Incubation period</b> | <b>Positive control</b> |
|-------------------------|-----------------|-------------------------------|--------------------------|-------------------------|
| GFAP                    | 1:500           | DAKO Z0334                    | ON 4°C                   | Brain                   |
| NF200 KDa (total)       | 1:5000          | SIGMA ALDRICH N-0142          | 40' RT                   | Brain                   |
| Iba1                    | 1:300           | ABCAM Ab 5076                 | ON 4°C                   | Brain                   |
| Parvalbumin             | 1:500           | SIGMA P3088 Clone PARV-19     | ON 4°C                   | Brain                   |
| PRRSV                   | 1:1000          | Ingenasa 1AC7                 | ON 4°C                   | Lung                    |
| PCV-2                   | 1:1000          | Ingenasa M.11.PCV.I36A9       | ON 4°C                   | Lymph node              |
| PrP <sup>Sc</sup>       | 1:100           | Prionics 6H4 (7500996)        | 60' RT                   | Brain                   |

ON=overnight; RT=room temperature
