# Supplementary material for: Porcine Forebrain Vacuolization Associated with Wasting in Pigs: A Novel Pathological Outcome Associated with Vitamin–Mineral Deficiency?
Source: MDPI journal article supplement (doi:10.3390/ani13142255), 2023-07-10
Supplement: s1 [file s1]

**Supplementary file S4.** Studied biochemical parameters in serum of pigs from farms No. 1 and 2.

|                      | <b>Animal<br/>reference</b> | <b>Alkaline<br/>Phosphatase<br/>(U/L)</b> | <b>Iron (µg/dL)</b> | <b>Calcium (mg/dL)</b> | <b>Phosphorus<br/>(mg/dL)</b> | <b>Magnesium<br/>(mg/dL)</b> |
|----------------------|-----------------------------|-------------------------------------------|---------------------|------------------------|-------------------------------|------------------------------|
| <b>Farm 1</b>        | N-364/17                    | 199.1                                     | 93.4                | 9.5                    | 9.85                          | 2.42                         |
|                      | N-365/17                    | 139.05                                    | 70.2                | 9.4                    | 9.68                          | 2.27                         |
|                      | N-366/17                    | 265.96                                    | 39.3                | 10                     | 11.35                         | 2.63                         |
|                      | N-367/17                    | 248.81                                    | 39.9                | 10.3                   | 10.59                         | 2.37                         |
|                      | N-368/17                    | 359.47                                    | 41.4                | 10.2                   | 11.5                          | 1.99                         |
|                      | N-369/17                    | 331.61                                    | 60.6                | 10.4                   | 10.6                          | 2.59                         |
|                      | N-370/17                    | 329.36                                    | 55.9                | 10                     | 9.47                          | 2.15                         |
|                      | N-371/17                    | 289.63                                    | 22                  | 10.3                   | 13.02                         | 2.25                         |
|                      | N-372/17                    | 392.27                                    | 81.2                | 10.3                   | 11.17                         | 2.33                         |
|                      | N-373/17                    | 170.75                                    | 6                   | 9.5                    | 8.75                          | 2.15                         |
| <b>Farm 2</b>        | N-354/17                    | 364.89                                    | 147.3               | 10.6                   | 9.23                          | 2.72                         |
|                      | N-355/17                    | 446.23                                    | 48.9                | 9                      | 8.43                          | 2.16                         |
|                      | N-356/17                    | 371.22                                    | 65.1                | 9.9                    | 10.21                         | 2.45                         |
|                      | N-357/17                    | 289.99                                    | 64                  | 10.5                   | 11.1                          | 2.74                         |
|                      | N-358/17                    | 337.51                                    | 36.8                | 9.9                    | 10.2                          | 2.37                         |
|                      | N-359/17                    | 231.28                                    | 101                 | 9.9                    | 6.44                          | 2.3                          |
|                      | N-360/17                    | 201.41                                    | 86.8                | 10.5                   | 7.66                          | 2.39                         |
|                      | N-361/17                    | 139.11                                    | 98.5                | 10.1                   | 9.43                          | 2.37                         |
|                      | N-362/17                    | 170.02                                    | 44.7                | 9.1                    | 9.66                          | 2.15                         |
|                      | N-363/17                    | 98.1                                      | 80.7                | 9.3                    | 7.41                          | 2.13                         |
| Reference<br>values* |                             | 120-400                                   | 73-140              | 7.1-11.6               | 5.3-9.6                       | 1.1-3.7                      |

\*Reference values: Clinical Examination of Farm Animals, Peter G.G. Jackson, Peter D. Cockcroft, Blackwell Science Ltd, 2002
