# Supplementary material for: Porcine Forebrain Vacuolization Associated with Wasting in Pigs: A Novel Pathological Outcome Associated with Vitamin–Mineral Deficiency?
Source: MDPI journal article supplement (doi:10.3390/ani13142255), 2023-07-10
Supplement: s1 [file s1]

**Supplementary file S3.** Animals submitted for necropsy and tests performed.

| Farm |  | Samples submitted | Healthy pigs (n) | Sick pigs (acute) (n)* | Biochemistry/Hematology | Heavy Metals | Molecular biology                                                                                          |
|------|--|-------------------|------------------|------------------------|-------------------------|--------------|------------------------------------------------------------------------------------------------------------|
| 1    |  | Whole pig         | 5                | 5                      | All pigs                | All pigs     | PCR (serum)<br><i>Mycoplasma</i> spp.<br>PRRSV, and PCV-3.<br>IHC PCV-2 and<br>PRRSV (lymphoid<br>tissues) |
| 2    |  | Whole pig         | 5                | 5                      | All pigs                | All pigs     | PCR (serum)<br><i>Mycoplasma</i> spp.<br>PRRSV, and PCV-3.<br>IHC PCV-2 and<br>PRRSV (lymphoid<br>tissues) |
| 3    |  | Whole pig         | NA               | 10                     | NP                      | All pigs     | PCR (serum)<br><i>Mycoplasma</i> spp.<br>PRRSV, and PCV-3.<br>IHC PCV-2 and<br>PRRSV (lymphoid<br>tissues) |
| 4    |  | Whole pig         | 5                | 5                      | NP                      | All pigs     | PCR (serum)<br><i>Mycoplasma</i> spp.<br>PRRSV, and PCV-3.<br>IHC PCV-2 and<br>PRRSV (lymphoid<br>tissues) |

|                       |  |           |    |   |    |    |                                                                                                               |
|-----------------------|--|-----------|----|---|----|----|---------------------------------------------------------------------------------------------------------------|
| 5                     |  | Whole pig | 5  | 6 | NP | NP | PCR (serum)<br><i>Mycoplasma</i> spp.<br>PRRSV, and PCV-3.<br>IHC PCV-2 and<br>PRRSV (lymphoid<br>tissues)    |
| 6                     |  | Brain     | 5  | 5 | NA | NA | PCR (serum)<br><i>Mycoplasma</i> spp.<br>PRRSV, and PCV-3.                                                    |
| 7                     |  | Brain     | NA | 5 | NA | NA | PCR (serum)<br><i>Mycoplasma</i> spp.<br>PRRSV, and PCV-3.                                                    |
| 8 (first<br>batch)    |  | Whole pig | 5  | 5 | NP | NP | RT-PCR (serum)<br><i>Mycoplasma</i> spp.<br>PRRSV, and PCV-3.<br>IHC PCV-2 and<br>PRRSV (lymphoid<br>tissues) |
| 8 (second<br>batch)** |  | Brain     | NA | 5 | NA | NA | PCR (serum)<br><i>Mycoplasma</i> spp.<br>PRRSV, and PCV-3.                                                    |

\*At the peak of the clinical problem.

\*\*Brain of 5 neonates were also submitted for histopathological assessment.

NP = not performed; NA = non-available
