# Supplementary material for: Porcine Forebrain Vacuolization Associated with Wasting in Pigs: A Novel Pathological Outcome Associated with Vitamin–Mineral Deficiency?
Source: Animals (Basel). 2023 Jul 10;13(14):2255. doi: 10.3390/ani13142255 (PMC10376092; doi:10.3390/ani13142255)
Supplement: Supplementary file 1 [file animals-13-02255-s001.zip › Supplementary file S6.xlsx]

## Sheet: Hoja1
	FARM 1										FARM 2										FARM 3										FARM 4
Ref	N-364/17	N-365/17	N-366/17	N-367/17	N-368/17	N-369/17	N-370/17	N-371/17	N-372/17	N-373/17	N-354/17	N-355/17	N-356/17	N-357/17	N-358/17	N-359/17	N-360/17	N-361/17	N-362/17	N-363/17	N-403/17	N-404/17	N-405/17	N-406/17	N-407/17	N-408/17	N-409/17	N-410/17	N-411/17	N-412/17	N-436/17	N-437/17	N-438/17	N-439/17	N-440/17	N-441/17	N-442/17	N-443/17	N-444/17	N-445/17
Li (ug/l)	< 20	< 20	< 20	< 20	< 20	< 20	< 20	< 20	< 20	< 20	< 20	< 20	< 20	< 20	< 20	< 20	< 20	< 20	< 20	< 20	< 20	< 20	< 20	< 20	< 20	< 20	< 20	< 20	< 20	< 20	78.2202	189.198	166.266	111.196	101.546	101.068	161.575	199.526	162.753	122.397
B (ug/l)	< 500	< 500	< 500	< 500	< 500	< 500	< 500	514.138	< 500	< 500	< 500	< 500	< 500	< 500	< 500	< 500	< 500	< 500	< 500	< 500	< 500	< 500	< 500	< 500	< 500	< 500	< 500	< 500	< 500	< 500	< 500	< 500	< 500	< 500	< 500	548.514	< 500	< 500	591.276	< 500
Mg (ug/l)	17548.3	16869	21632.3	18601.9	15799.4	17736.5	15709.9	17787.1	15812.4	15755.1	20069.5	17108.5	16835.1	17411.3	15328.7	16198.7	16176.5	16710	14747	15513	21530.1	30191.3	26483.3	23626.9	30358.5	30537.6	28936.1	28636	26418.7	20638	21289.5	22460.3	24363.5	25712.2	16779.3	29133.3	20120.5	17673	28187.2	21320.8
Al (ug/l)	< 1000	< 1000	< 1000	< 1000	< 1000	< 1000	< 1000	< 1000	< 1000	< 1000	< 1000	< 1000	< 1000	< 1000	< 1000	< 1000	< 1000	< 1000	< 1000	< 1000	< 1000	< 1000	< 1000	< 1000	< 1000	< 1000	< 1000	< 1000	< 1000	< 1000	< 1000	< 1000	< 1000	< 1000	< 1000	< 1000	< 1000	< 1000	< 1000	< 1000
Si (ug/l)	< 10000	< 10000	< 10000	< 10000	< 10000	< 10000	< 10000	< 10000	< 10000	< 10000	< 10000	< 10000	< 10000	< 10000	< 10000	< 10000	< 10000	< 10000	< 10000	< 10000	< 10000	< 10000	< 10000	< 10000	< 10000	< 10000	< 10000	< 10000	< 10000	< 10000	< 10000	< 10000	< 10000	< 10000	< 10000	10220.5	< 10000	< 10000	11153	< 10000
P (ug/l)	137678	129671	149539	142304	153473	146532	122154	178068	144420	117533	130279	115686	122597	136906	128435	85370.6	99051.3	118516	109482	93446.8	163723	192713	167946	156677	174288	193701	211956	192934	174132	189547	155279	194788	154495	165289	108934	205658	159228	168861	202901	189689
S (ug/l)	318844	309909	278892	337050	316659	326971	319007	316998	305618	279327	308539	253992	278066	285819	254560	305664	297181	293252	245270	280372	309933	353590	361991	345004	330401	390323	350595	353753	329634	330272	359346	332344	362835	318572	244556	365226	259352	288358	407382	339930
Cl (ug/l)	2.2306e+06	2.35905e+06	2.38525e+06	2.32577e+06	2.48553e+06	2.22126e+06	2.22229e+06	2.33664e+06	2.28957e+06	2.38433e+06	2.51646e+06	2.49499e+06	2.25003e+06	2.18542e+06	2.24255e+06	2.38736e+06	2.13615e+06	2.19173e+06	2.18627e+06	2.19269e+06	2.33785e+06	2.42452e+06	2.22133e+06	2.33624e+06	2.40935e+06	2.39423e+06	2.31758e+06	2.49741e+06	2.42674e+06	2.50484e+06	2.46104e+06	2.26962e+06	2.30074e+06	2.43724e+06	2.0778e+06	2.54229e+06	2.23979e+06	2.15328e+06	2.51896e+06	2.35161e+06
K (ug/l)	176397	204662	204085	210144	191521	209251	206990	182998	216625	164690	184760	169187	170501	175839	172579	141581	165453	177956	187299	159865	182120	223630	206494	176330	199614	182116	217629	204664	221956	195956	315406	395642	461221	395361	227856	353241	303768	290431	375957	323024
Ca (ug/l)	81966.3	83310.3	84951	89792.7	88012.7	89059.4	85351.7	83896.2	89831.6	85062.6	92861.7	81681.2	85370.2	82833.2	81362.7	85420.5	85182.7	82879.9	76963.4	79499.9	80524.2	87101.9	87647	83656.3	88280.1	92190.4	87344.1	88537.8	80608.3	89756.3	95429.2	76743.7	88995.1	85053	69208.4	93495.1	80445.4	80536.8	99731.1	91544.3
Ti (ug/l)	< 20	< 20	< 20	< 20	< 20	< 20	< 20	23.5321	< 20	< 20	< 20	< 20	< 20	< 20	< 20	< 20	< 20	< 20	< 20	< 20	< 20	< 20	< 20	< 20	< 20	< 20	< 20	< 20	< 20	< 20	< 20	20.4944	< 20	< 20	< 20	< 20	< 20	< 20	< 20	21.1637
V (ug/l)	< 20	< 20	< 20	< 20	< 20	< 20	< 20	< 20	< 20	< 20	< 20	< 20	< 20	< 20	< 20	< 20	< 20	< 20	< 20	< 20	< 20	< 20	< 20	< 20	< 20	< 20	< 20	< 20	< 20	< 20	< 20	< 20	< 20	< 20	< 20	< 20	< 20	< 20	< 20	< 20
Cr (ug/l)	< 20	< 20	< 20	< 20	< 20	< 20	< 20	< 20	< 20	< 20	< 20	< 20	< 20	< 20	< 20	< 20	< 20	< 20	< 20	< 20	< 20	< 20	< 20	< 20	< 20	< 20	< 20	< 20	< 20	< 20	< 20	< 20	< 20	< 20	< 20	< 20	< 20	< 20	< 20	< 20
Mn (ug/l)	< 20	< 20	< 20	< 20	< 20	< 20	< 20	< 20	< 20	< 20	< 20	< 20	< 20	< 20	< 20	< 20	< 20	< 20	< 20	< 20	< 20	< 20	< 20	< 20	< 20	< 20	< 20	< 20	< 20	< 20	< 20	< 20	< 20	< 20	< 20	< 20	< 20	< 20	< 20	< 20
Fe (ug/l)	1023.71	989.596	563.983	678.964	705.608	1023.96	814.53	355.188	1021.84	340.213	1706.79	673.659	818.621	757.178	461.368	2086.1	973.928	1077.55	762.26	1682.69	861.163	1783.95	1084.8	822.395	591.994	1013.21	1024.32	1041.47	493.905	1412.77	2266.22	11406.6	5674.02	5246.32	1161.47	3164.85	2816.98	2534.42	2161.28	3678.66
Co (ug/l)	< 20	< 20	< 20	< 20	< 20	< 20	< 20	< 20	< 20	< 20	< 20	< 20	< 20	< 20	< 20	< 20	< 20	< 20	< 20	< 20	< 20	< 20	< 20	< 20	< 20	< 20	< 20	< 20	< 20	< 20	< 20	< 20	< 20	< 20	< 20	< 20	< 20	< 20	< 20	< 20
Ni (ug/l)	< 20	< 20	< 20	< 20	< 20	< 20	< 20	< 20	< 20	< 20	< 20	< 20	< 20	< 20	< 20	< 20	< 20	< 20	< 20	< 20	< 20	< 20	< 20	< 20	< 20	< 20	< 20	< 20	< 20	< 20	< 20	< 20	< 20	< 20	< 20	< 20	< 20	< 20	< 20	< 20
Cu (ug/l)	1078.17	1276.42	1191.26	1391.14	1096.14	1004.3	1044.84	939.619	1021.66	1244.18	1158.03	1389.11	1254.8	992.306	1002.63	1168.19	1117.43	944.67	873.137	1144.58	1021	1315.72	1257.45	1419.78	1236.86	1507.42	1075.06	1135.51	1425.27	1148.66	1208.46	1192.49	1140.03	1650.28	1059.51	1292.48	1076.77	987.485	1444.51	933.304
Zn (ug/l)	1593.86	2106.62	1446.96	2200.9	2176.82	2755.07	1881.69	2284.87	1890.27	1800.13	1834.81	1592.85	1557.65	1930.65	1346.82	1953.77	1970.89	1561.13	1365.15	1616.75	1581.71	1450.06	1326.78	1899.55	1379.88	2051.07	2439.38	2785.6	2021.19	1880.86	1435.14	2021.62	946.775	798.505	825.569	3376.6	2424.45	2322.27	2799.52	3088.51
As (ug/l)	< 20	< 20	< 20	< 20	< 20	< 20	< 20	< 20	< 20	< 20	< 20	< 20	< 20	< 20	< 20	< 20	< 20	< 20	< 20	< 20	< 20	< 20	< 20	< 20	< 20	< 20	< 20	< 20	< 20	< 20	< 20	< 20	< 20	< 20	< 20	< 20	< 20	< 20	< 20	< 20
Se (ug/l)	134.591	116.395	118.92	119.017	110.191	151.224	133.637	119.719	115.515	118.744	122.203	79.9845	97.0779	106.882	90.3943	128.689	115.115	143.163	106.763	102.796	153.586	157.614	160.287	137.469	141.768	185.297	123.631	186.27	134.173	149.917	144.219	142.564	113.615	141.943	80.6269	129.481	109.958	90.9157	123.79	106.315
Br (ug/l)	5227.87	6939.89	5568.15	5429.54	5825.76	5807.92	6037.72	4875.77	6866.07	6032.45	5900.34	5010.28	5121.59	5527.95	4876.34	6197.79	5144.33	5077.41	4771.59	4744.63	6647.66	7171.81	7032.64	7227.26	7058.89	8079.5	6858.78	8533.29	6756.45	8153.08	9450.64	9105.68	9531.64	6327.26	5236.14	6947.83	9110.76	8673.73	7997.27	8710.97
Rb (ug/l)	112.899	137.394	122.12	122.219	112.129	124.582	122.909	104.804	144.264	100.842	154.946	129.482	149.671	151.545	141.274	121.188	137.746	160.618	158.708	126.864	171.337	208.025	219.039	193.108	200.797	192.718	212.56	217.464	194.317	205.393	319.727	441.179	503.276	355.346	196.081	310.989	304.69	252.773	330.43	312.371
Sr (ug/l)	49.0536	49.6709	50.1577	49.5644	61.3274	57.5762	57.3998	54.2832	48.7557	48.3867	40.9483	39.4551	43.9546	37.6213	36.2592	41.4646	37.6849	31.6169	36.0169	43.9017	48.8694	54.7702	48.0962	51.7383	56.0582	53.6845	57.567	55.0467	51.0935	61.8146	47.4987	46.9491	38.8317	39.0077	35.3289	48.811	45.0493	50.108	46.3238	53.0857
Zr (ug/l)	< 20	< 20	< 20	< 20	< 20	< 20	< 20	< 20	< 20	< 20	< 20	< 20	< 20	< 20	< 20	< 20	< 20	< 20	< 20	< 20	< 20	< 20	< 20	< 20	< 20	< 20	< 20	< 20	< 20	< 20	< 20	< 20	< 20	< 20	< 20	< 20	< 20	< 20	< 20	< 20
Nb (ug/l)	< 20	< 20	< 20	< 20	< 20	< 20	< 20	< 20	< 20	< 20	< 20	< 20	< 20	< 20	< 20	< 20	< 20	< 20	< 20	< 20	< 20	< 20	< 20	< 20	< 20	< 20	< 20	< 20	< 20	< 20	< 20	< 20	< 20	< 20	< 20	< 20	< 20	< 20	< 20	< 20
Mo (ug/l)	< 20	< 20	< 20	< 20	20.184	22.6128	< 20	22.4415	< 20	< 20	< 20	20.3721	< 20	< 20	< 20	< 20	< 20	< 20	< 20	< 20	< 20	< 20	< 20	< 20	< 20	< 20	29.0285	< 20	< 20	< 20	25.0424	30.5267	< 20	29.8042	< 20	40.6159	47.1013	35.9247	53.5968	52.8264
Ru (ug/l)	< 20	< 20	< 20	< 20	< 20	< 20	< 20	< 20	< 20	< 20	< 20	< 20	< 20	< 20	< 20	< 20	< 20	< 20	< 20	< 20	< 20	< 20	< 20	< 20	< 20	< 20	< 20	< 20	< 20	< 20	< 20	< 20	< 20	< 20	< 20	< 20	< 20	< 20	< 20	< 20
Rh (ug/l)	< 20	< 20	< 20	< 20	< 20	< 20	< 20	< 20	< 20	< 20	< 20	< 20	< 20	< 20	< 20	< 20	< 20	< 20	< 20	< 20	< 20	< 20	< 20	< 20	< 20	< 20	< 20	< 20	< 20	< 20	< 20	< 20	< 20	< 20	< 20	< 20	< 20	< 20	< 20	< 20
Pd (ug/l)	< 20	< 20	< 20	< 20	< 20	< 20	< 20	< 20	< 20	< 20	< 20	< 20	< 20	< 20	< 20	< 20	< 20	< 20	< 20	< 20	< 20	< 20	< 20	< 20	< 20	< 20	< 20	< 20	< 20	< 20	< 20	< 20	< 20	< 20	< 20	< 20	< 20	< 20	< 20	< 20
Ag (ug/l)	< 20	< 20	< 20	< 20	< 20	< 20	< 20	< 20	< 20	< 20	< 20	< 20	< 20	< 20	< 20	< 20	< 20	< 20	< 20	< 20	< 20	< 20	< 20	< 20	< 20	< 20	< 20	< 20	< 20	< 20	< 20	< 20	< 20	< 20	< 20	< 20	< 20	< 20	< 20	< 20
Cd (ug/l)	< 20	< 20	< 20	< 20	< 20	< 20	< 20	< 20	< 20	< 20	< 20	< 20	< 20	< 20	< 20	< 20	< 20	< 20	< 20	< 20	< 20	< 20	< 20	< 20	< 20	< 20	< 20	< 20	< 20	< 20	< 20	< 20	< 20	< 20	< 20	< 20	< 20	< 20	< 20	< 20
Sn (ug/l)	< 20	< 20	< 20	< 20	< 20	< 20	< 20	< 20	< 20	< 20	< 20	< 20	< 20	< 20	< 20	< 20	< 20	< 20	< 20	< 20	< 20	< 20	< 20	< 20	< 20	< 20	< 20	< 20	< 20	< 20	< 20	< 20	< 20	< 20	< 20	< 20	< 20	< 20	< 20	< 20
Sb (ug/l)	< 20	< 20	< 20	< 20	< 20	< 20	< 20	< 20	< 20	< 20	< 20	< 20	< 20	< 20	< 20	< 20	< 20	< 20	< 20	< 20	< 20	< 20	< 20	< 20	< 20	< 20	< 20	< 20	< 20	< 20	< 20	< 20	< 20	< 20	< 20	< 20	< 20	21.5687	< 20	< 20
Te (ug/l)	< 20	< 20	< 20	< 20	< 20	< 20	< 20	< 20	< 20	< 20	< 20	< 20	< 20	< 20	< 20	< 20	< 20	< 20	< 20	< 20	< 20	< 20	< 20	< 20	< 20	< 20	< 20	< 20	< 20	< 20	< 20	< 20	< 20	< 20	< 20	< 20	< 20	< 20	< 20	< 20
I (ug/l)	49.5595	57.9118	59.7465	56.3503	72.6143	75.6483	69.0666	60.9909	74.3447	36.6337	151.225	144.968	90.9053	101.728	104.849	69.6444	69.3722	81.8815	67.8619	48.9638	32.0923	40.0725	44.0508	34.5809	50.7487	52.2475	55.4724	47.425	31.8692	54.9086	81.5843	85.3427	57.2837	67.1401	78.3904	120.175	88.397	108.28	101.148	104.358
Cs (ug/l)	< 20	< 20	< 20	< 20	< 20	< 20	< 20	< 20	< 20	< 20	< 20	< 20	< 20	< 20	< 20	< 20	< 20	< 20	< 20	< 20	< 20	< 20	< 20	< 20	< 20	< 20	< 20	< 20	< 20	< 20	< 20	< 20	< 20	< 20	< 20	< 20	< 20	< 20	< 20	< 20
Ba (ug/l)	< 20	< 20	< 20	< 20	< 20	< 20	< 20	< 20	< 20	< 20	< 20	< 20	< 20	< 20	< 20	< 20	< 20	< 20	< 20	< 20	119.029	116.205	111.579	115.52	108.535	132.948	122.619	113.465	129.322	128.754	< 20	< 20	20.6367	< 20	< 20	< 20	< 20	< 20	< 20	< 20
La (ug/l)	< 20	< 20	< 20	< 20	< 20	< 20	< 20	< 20	< 20	< 20	< 20	< 20	< 20	< 20	< 20	< 20	< 20	< 20	< 20	< 20	< 20	< 20	< 20	< 20	< 20	< 20	< 20	< 20	< 20	< 20	< 20	< 20	< 20	< 20	< 20	< 20	< 20	< 20	< 20	< 20
Ce (ug/l)	< 2	< 2	< 2	< 2	< 2	< 2	< 2	< 2	< 2	< 2	< 2	< 2	< 2	< 2	< 2	< 2	< 2	< 2	< 2	< 2	7.93697	7.97003	5.33091	6.18968	6.62006	7.63601	6.8496	6.10117	7.32853	6.82853	< 2	< 2	< 2	< 2	< 2	< 2	< 2	< 2	< 2	< 2
Pr (ug/l)	< 20	< 20	< 20	< 20	< 20	< 20	< 20	< 20	< 20	< 20	< 20	< 20	< 20	< 20	< 20	< 20	< 20	< 20	< 20	< 20	< 20	< 20	< 20	< 20	< 20	< 20	< 20	< 20	< 20	< 20	< 20	< 20	< 20	< 20	< 20	< 20	< 20	< 20	< 20	< 20
Nd (ug/l)	< 20	< 20	< 20	< 20	< 20	< 20	< 20	< 20	< 20	< 20	< 20	< 20	< 20	< 20	< 20	< 20	< 20	< 20	< 20	< 20	< 20	< 20	< 20	< 20	< 20	< 20	< 20	< 20	< 20	< 20	< 20	< 20	< 20	< 20	< 20	< 20	< 20	< 20	< 20	< 20
Sm (ug/l)	< 20	< 20	< 20	< 20	< 20	< 20	< 20	< 20	< 20	< 20	< 20	< 20	< 20	< 20	< 20	< 20	< 20	< 20	< 20	< 20	< 20	< 20	< 20	< 20	< 20	< 20	< 20	< 20	< 20	< 20	< 20	< 20	< 20	< 20	< 20	< 20	< 20	< 20	< 20	< 20
Eu (ug/l)	< 20	< 20	< 20	< 20	< 20	< 20	< 20	< 20	< 20	< 20	< 20	< 20	< 20	< 20	< 20	< 20	< 20	< 20	< 20	< 20	< 20	< 20	< 20	< 20	< 20	< 20	< 20	< 20	< 20	< 20	< 20	< 20	< 20	< 20	< 20	< 20	< 20	< 20	< 20	< 20
Gd (ug/l)	< 20	< 20	< 20	< 20	< 20	< 20	< 20	< 20	< 20	< 20	< 20	< 20	< 20	< 20	< 20	< 20	< 20	< 20	< 20	< 20	< 20	< 20	< 20	< 20	< 20	< 20	< 20	< 20	< 20	< 20	< 20	< 20	< 20	< 20	< 20	< 20	< 20	< 20	< 20	< 20
Dy (ug/l)	< 20	< 20	< 20	< 20	< 20	< 20	< 20	< 20	< 20	< 20	< 20	< 20	< 20	< 20	< 20	< 20	< 20	< 20	< 20	< 20	< 20	< 20	< 20	< 20	< 20	< 20	< 20	< 20	< 20	< 20	< 20	< 20	< 20	< 20	< 20	< 20	< 20	< 20	< 20	< 20
Ho (ug/l)	< 20	< 20	< 20	< 20	< 20	< 20	< 20	< 20	< 20	< 20	< 20	< 20	< 20	< 20	< 20	< 20	< 20	< 20	< 20	< 20	< 20	< 20	< 20	< 20	< 20	< 20	< 20	< 20	< 20	< 20	< 20	< 20	< 20	< 20	< 20	< 20	< 20	< 20	< 20	< 20
Er (ug/l)	< 20	< 20	< 20	< 20	< 20	< 20	< 20	< 20	< 20	< 20	< 20	< 20	< 20	< 20	< 20	< 20	< 20	< 20	< 20	< 20	< 20	< 20	< 20	< 20	< 20	< 20	< 20	< 20	< 20	< 20	< 20	< 20	< 20	< 20	< 20	< 20	< 20	< 20	< 20	< 20
Tm (ug/l)	< 20	< 20	< 20	< 20	< 20	< 20	< 20	< 20	< 20	< 20	< 20	< 20	< 20	< 20	< 20	< 20	< 20	< 20	< 20	< 20	< 20	< 20	< 20	< 20	< 20	< 20	< 20	< 20	< 20	< 20	< 20	< 20	< 20	< 20	< 20	< 20	< 20	< 20	< 20	< 20
Yb (ug/l)	< 20	< 20	< 20	< 20	< 20	< 20	< 20	< 20	< 20	< 20	< 20	< 20	< 20	< 20	< 20	< 20	< 20	< 20	< 20	< 20	< 20	< 20	< 20	< 20	< 20	< 20	< 20	< 20	< 20	< 20	< 20	< 20	< 20	< 20	< 20	< 20	< 20	< 20	< 20	< 20
Lu (ug/l)	< 20	< 20	< 20	< 20	< 20	< 20	< 20	< 20	< 20	< 20	< 20	< 20	< 20	< 20	< 20	< 20	< 20	< 20	< 20	< 20	< 20	< 20	< 20	< 20	< 20	< 20	< 20	< 20	< 20	< 20	< 20	< 20	< 20	< 20	< 20	< 20	< 20	< 20	< 20	< 20
Hf (ug/l)	< 20	< 20	< 20	< 20	< 20	< 20	< 20	< 20	< 20	< 20	< 20	< 20	< 20	< 20	< 20	< 20	< 20	< 20	< 20	< 20	< 20	< 20	< 20	< 20	< 20	< 20	< 20	< 20	< 20	< 20	< 20	< 20	< 20	< 20	< 20	< 20	< 20	< 20	< 20	< 20
Ta (ug/l)	< 20	< 20	< 20	< 20	< 20	< 20	< 20	< 20	< 20	< 20	< 20	< 20	< 20	< 20	< 20	< 20	< 20	< 20	< 20	< 20	< 20	< 20	< 20	< 20	< 20	< 20	< 20	< 20	< 20	< 20	< 20	< 20	< 20	< 20	< 20	< 20	< 20	< 20	< 20	< 20
W (ug/l)	< 20	< 20	< 20	< 20	< 20	< 20	< 20	< 20	< 20	< 20	< 20	< 20	< 20	< 20	< 20	< 20	< 20	< 20	< 20	< 20	< 20	< 20	< 20	< 20	< 20	< 20	< 20	< 20	< 20	< 20	< 20	< 20	< 20	< 20	< 20	< 20	< 20	< 20	< 20	< 20
Re (ug/l)	< 20	< 20	< 20	< 20	< 20	< 20	< 20	< 20	< 20	< 20	< 20	< 20	< 20	< 20	< 20	< 20	< 20	< 20	< 20	< 20	< 20	< 20	< 20	< 20	< 20	< 20	< 20	< 20	< 20	< 20	< 20	< 20	< 20	< 20	< 20	< 20	< 20	< 20	< 20	< 20
Os (ug/l)	< 20	< 20	< 20	< 20	< 20	< 20	< 20	< 20	< 20	< 20	< 20	< 20	< 20	< 20	< 20	< 20	< 20	< 20	< 20	< 20	< 20	< 20	< 20	< 20	< 20	< 20	< 20	< 20	< 20	< 20	< 20	< 20	< 20	< 20	< 20	< 20	< 20	< 20	< 20	< 20
Ir (ug/l)	< 20	< 20	< 20	< 20	< 20	< 20	< 20	< 20	< 20	< 20	< 20	< 20	< 20	< 20	< 20	< 20	< 20	< 20	< 20	< 20	< 20	< 20	< 20	< 20	< 20	< 20	< 20	< 20	< 20	< 20	< 20	< 20	< 20	< 20	< 20	< 20	< 20	< 20	< 20	< 20
Pt (ug/l)	< 20	< 20	< 20	< 20	< 20	< 20	< 20	< 20	< 20	< 20	< 20	< 20	< 20	< 20	< 20	< 20	< 20	< 20	< 20	< 20	< 20	< 20	< 20	< 20	< 20	< 20	< 20	< 20	< 20	< 20	< 20	< 20	< 20	< 20	< 20	< 20	< 20	< 20	< 20	< 20
Au (ug/l)	< 20	< 20	< 20	< 20	< 20	< 20	< 20	< 20	< 20	< 20	< 20	< 20	< 20	< 20	< 20	< 20	< 20	< 20	< 20	< 20	< 20	< 20	< 20	< 20	< 20	< 20	< 20	< 20	< 20	< 20	< 20	< 20	< 20	< 20	< 20	< 20	< 20	< 20	< 20	< 20
Hg (ug/l)	< 20	< 20	< 20	< 20	< 20	< 20	< 20	< 20	< 20	< 20	< 20	< 20	< 20	< 20	< 20	< 20	< 20	< 20	< 20	< 20	< 20	< 20	< 20	< 20	< 20	< 20	< 20	< 20	< 20	< 20	< 20	< 20	< 20	< 20	< 20	< 20	< 20	< 20	< 20	< 20
Pb (ug/l)	< 20	< 20	< 20	< 20	< 20	< 20	< 20	< 20	< 20	< 20	< 20	< 20	< 20	< 20	< 20	< 20	< 20	< 20	< 20	< 20	< 20	< 20	< 20	< 20	< 20	< 20	< 20	< 20	< 20	< 20	< 20	< 20	< 20	< 20	< 20	< 20	< 20	< 20	< 20	< 20
Bi (ug/l)	< 20	< 20	< 20	< 20	< 20	< 20	< 20	< 20	< 20	< 20	< 20	< 20	< 20	< 20	< 20	< 20	< 20	< 20	< 20	< 20	< 20	< 20	< 20	< 20	< 20	< 20	< 20	< 20	< 20	< 20	< 20	< 20	< 20	< 20	< 20	< 20	< 20	< 20	< 20	< 20
Th (ug/l)	< 20	< 20	< 20	< 20	< 20	< 20	< 20	< 20	< 20	< 20	< 20	< 20	< 20	< 20	< 20	< 20	< 20	< 20	< 20	< 20	< 20	< 20	< 20	< 20	< 20	< 20	< 20	< 20	< 20	< 20	< 20	< 20	< 20	< 20	< 20	< 20	< 20	< 20	< 20	< 20
U (ug/l)	< 20	< 20	< 20	< 20	< 20	< 20	< 20	< 20	< 20	< 20	< 20	< 20	< 20	< 20	< 20	< 20	< 20	< 20	< 20	< 20	< 20	< 20	< 20	< 20	< 20	< 20	< 20	< 20	< 20	< 20	< 20	< 20	< 20	< 20	< 20	< 20	< 20	< 20	< 20	< 20
